# Supplementary material
Source: PubMed Central journal article supplement (PMC4724223)
Supplement: NIHMS718459-supplement-1.pdf [file NIHMS718459-supplement-1.pdf]

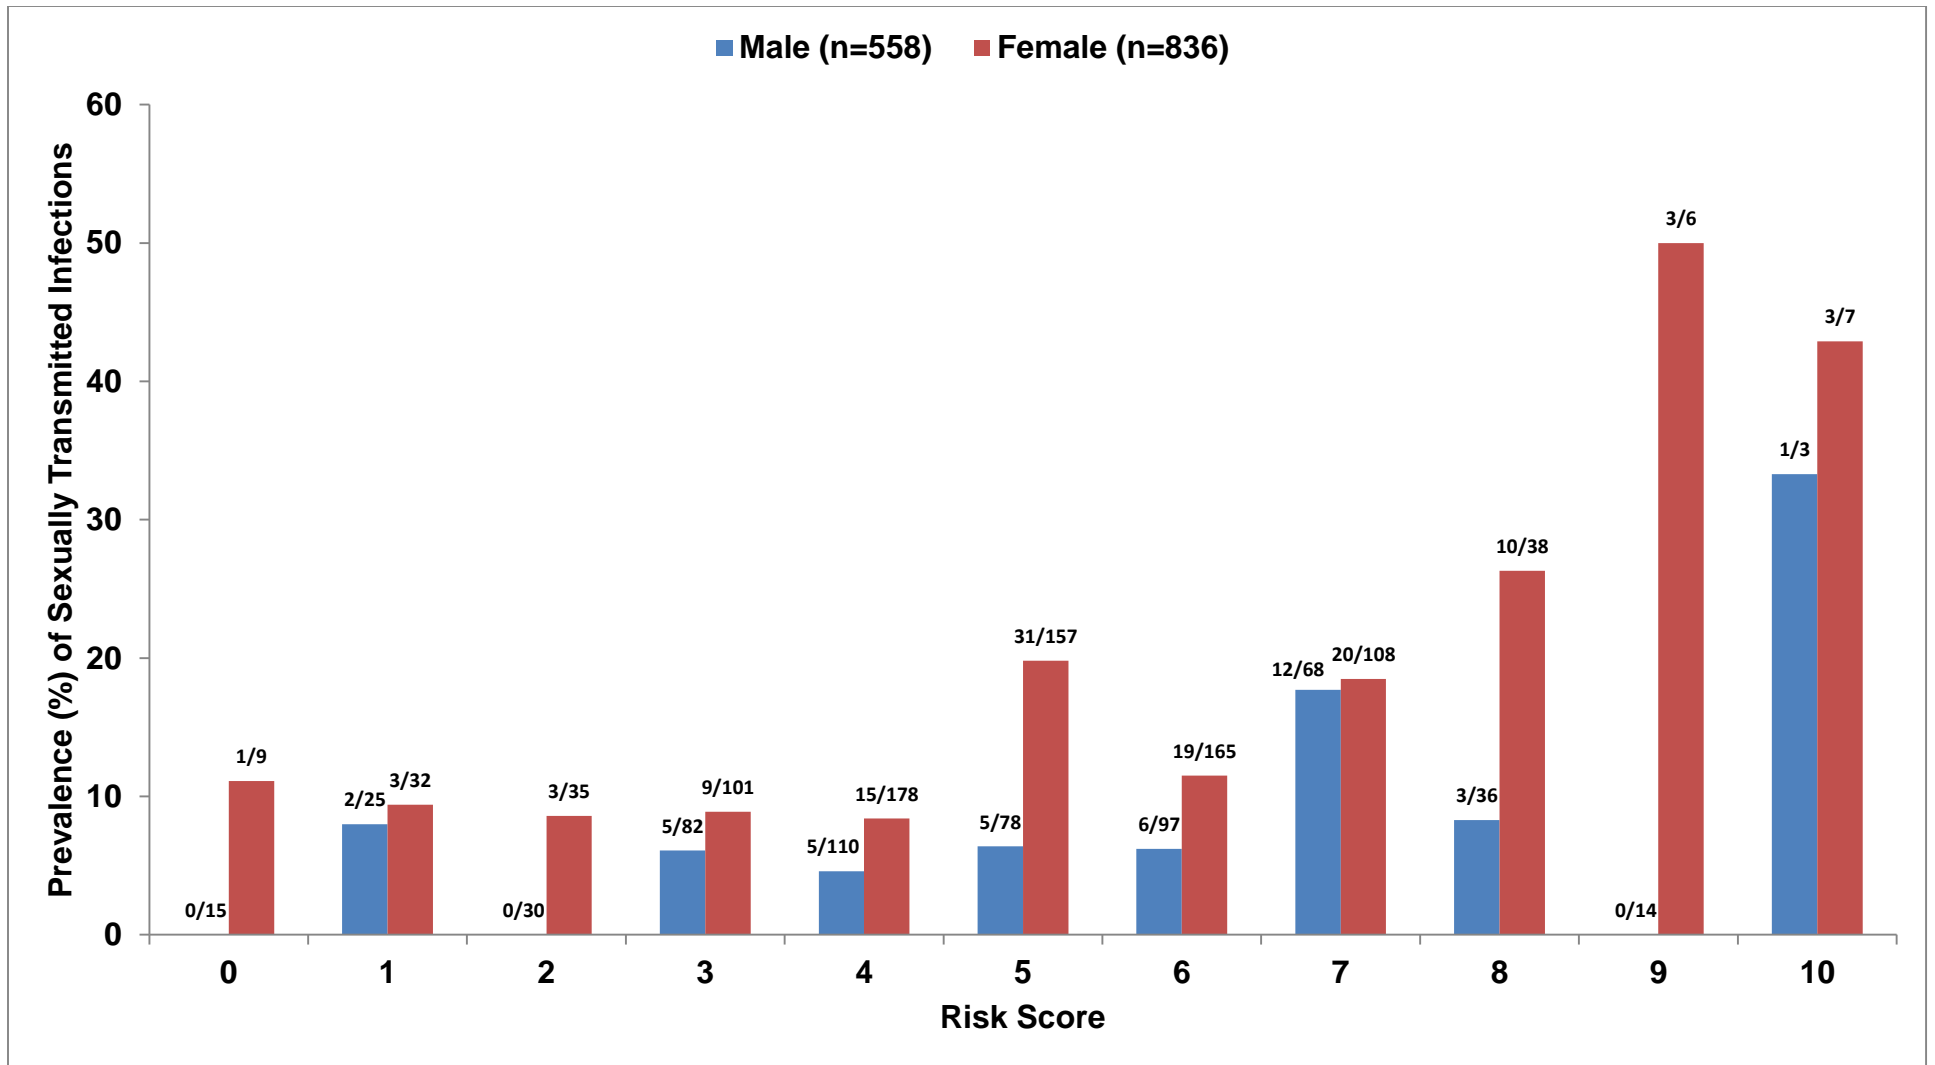

Supplementary Figure

Prevalence of Sexually Transmitted Infections (Chlamydia, Gonorrhoea, and Trichomonas) by Gender and I Want The Kit (IWTK) Risk Score in 1,394 Participants.
